# Supplementary material for: Structural insights into DNA degradation by human mitochondrial nuclease MGME1
Source: PubMed Central journal article supplement (PMC6237815; doi:10.1093/nar/gky855), 2018-09-21
Supplement: gky855_supplemental_files.pdf [file gky855_supplemental_files.pdf]

# Supplementary Data

For

## Structural insights into DNA degradation by human mitochondrial nuclease MGME1

Chun Yang<sup>1</sup>, Ruiqi Wu<sup>1</sup>, Hehua Liu<sup>1,2</sup>, Yiqing Chen<sup>1</sup>, Yanqing Gao<sup>1</sup>, Xi Chen<sup>1</sup>,  
Yangyang Li<sup>1</sup>, Jinbiao Ma<sup>2</sup>, Jixi Li<sup>1,3\*</sup>, Jianhua Gan<sup>1,\*</sup>

<sup>1</sup>State Key Laboratory of Genetic Engineering, Collaborative Innovation Center of  
Genetics and Development, Department of Physiology and Biophysics, School of Life  
Sciences, Fudan University, Shanghai, 200433, China

<sup>2</sup>State Key Laboratory of Genetic Engineering, Collaborative Innovation Center of  
Genetics and Development, Department of Biochemistry, School of Life Sciences,  
Fudan University, Shanghai, 200433, China

<sup>3</sup>Department of Neurology, Huashan Hospital, Fudan University, Shanghai, 200040,  
China

**\*Correspondence to:** [ganjhh@fudan.edu.cn](mailto:ganjhh@fudan.edu.cn) or [ljjixi@fudan.edu.cn](mailto:ljjixi@fudan.edu.cn)

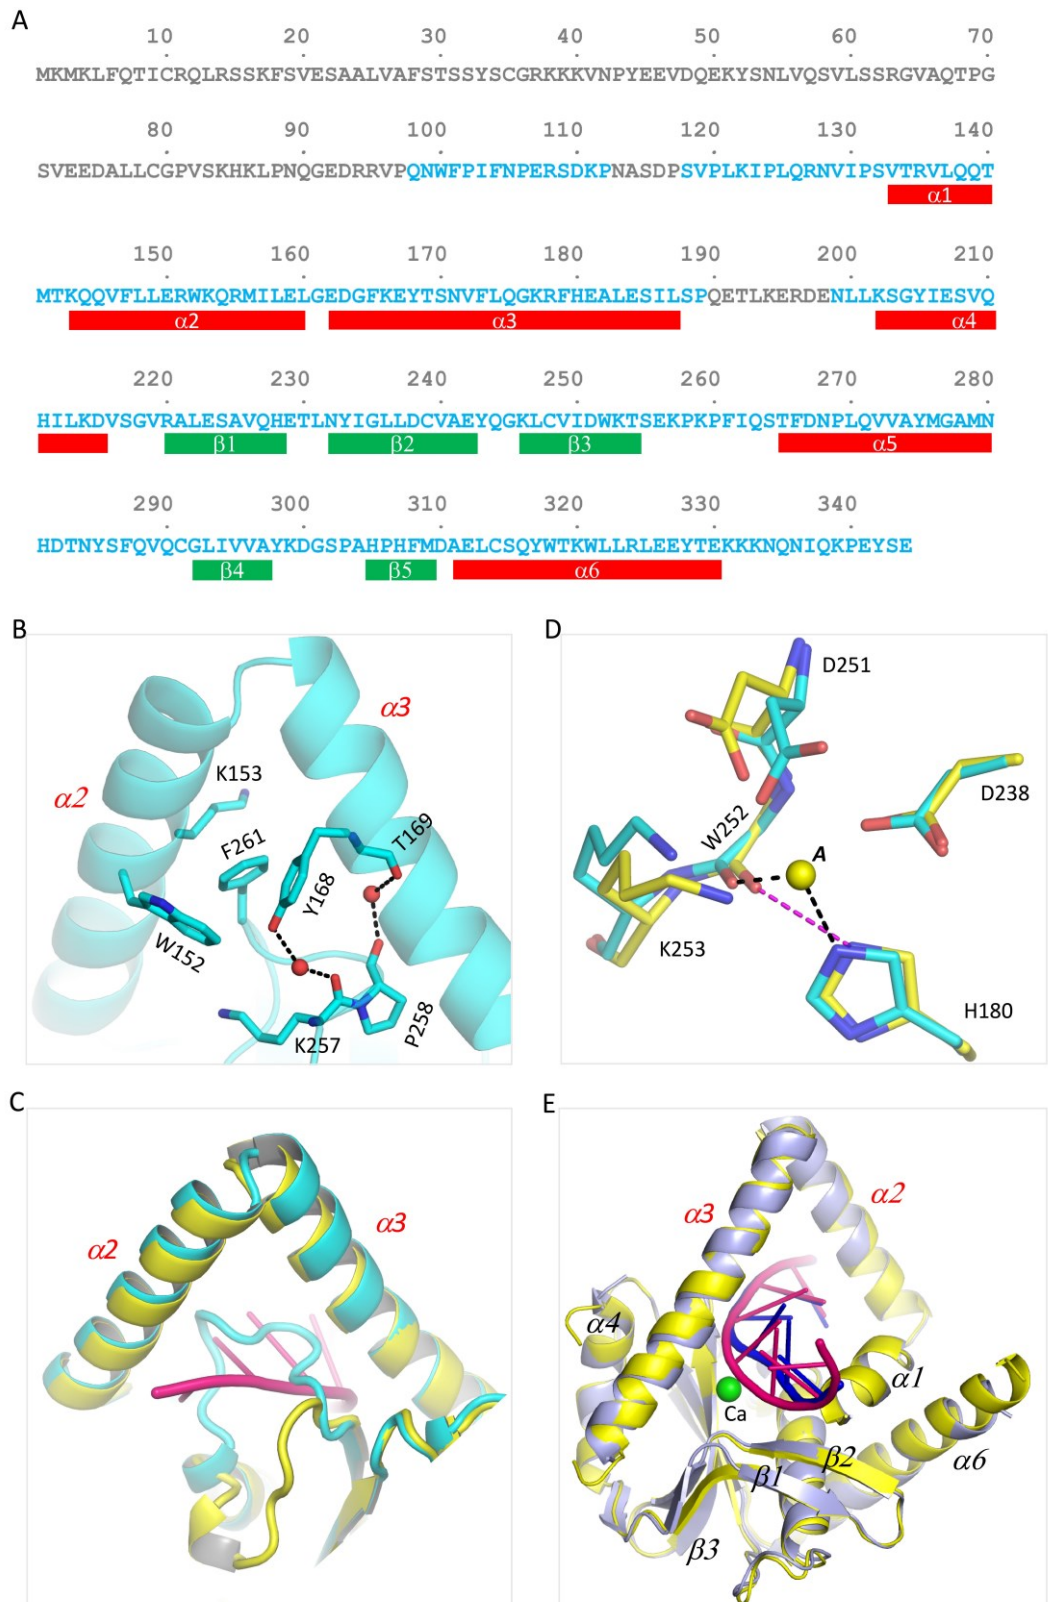

**Supplementary Figure S1. Conformational changes of *Hs*MGME1.** (A) Sequence and secondary structure of *Hs*MGME1. Residues disordered in *Hs*MGME1-Mn<sup>2+</sup> complex are colored in gray. (B) Detailed conformations of the helical arch and  $\beta$ 3- $\alpha$ 5

connecting loop observed in the *HsMGME1*-Mn<sup>2+</sup> complex. **(C)** Superposition of *HsMGME1*-Mn<sup>2+</sup> and *HsMGME1*-ssDNA2 complexes showing the conformational change of the  $\beta$ 3- $\alpha$ 5 connecting loops. **(D)** Comparison of the catalytic site residues of *HsMGME1*-Mn<sup>2+</sup> and *HsMGME1*-ssDNA2. **(E)** Superposition showing the local conformational difference of the DNAs, which are shown as magenta and blue cartoons in *HsMGME1*-ssDNA2 and H180Q-ssDNA2-Ca<sup>2+</sup> complexes, respectively. Water molecules, Mn<sup>2+</sup> and Ca<sup>2+</sup> are shown as red, yellow, and green spheres, respectively.

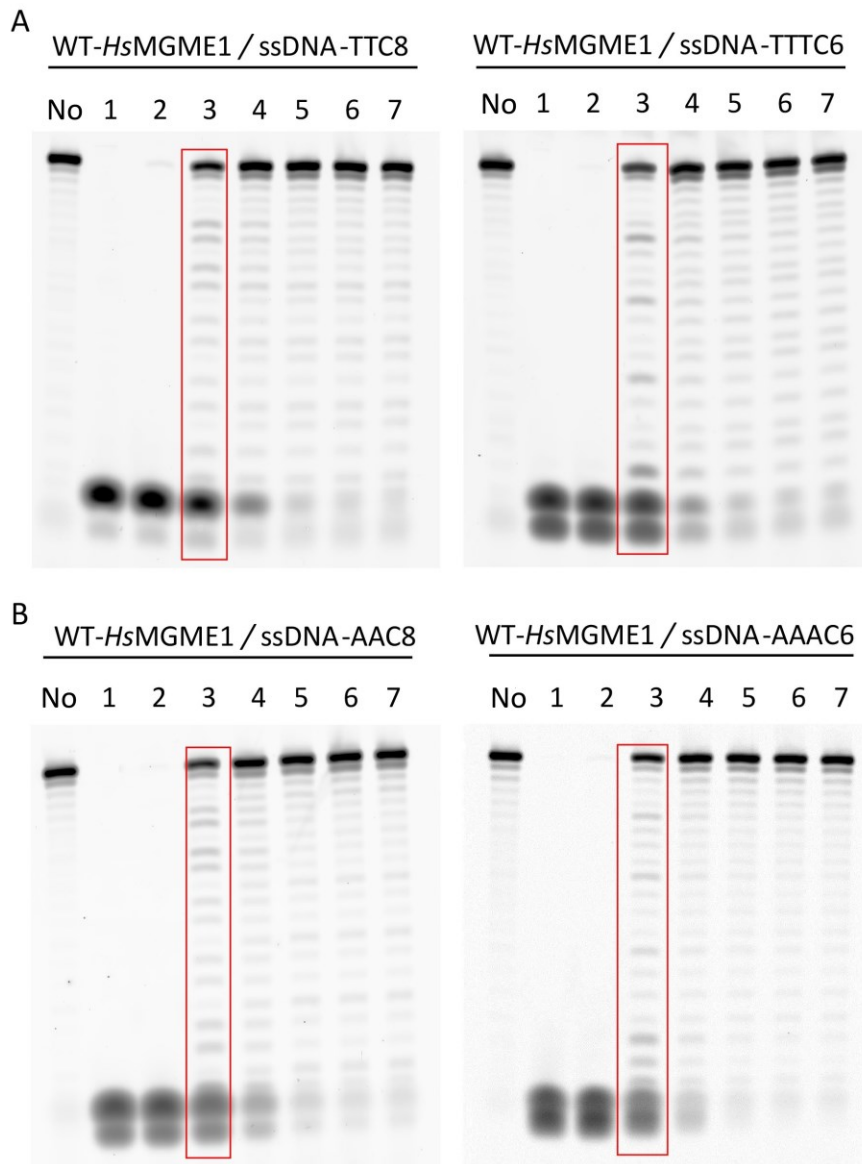

**Supplementary Figure S2. The weak cleavage site preference of *HsMGME1*.** (A) *in vitro* ssDNA-TTC8 and ssDNA-TTTC6 cleavage by WT *HsMGME1*. (B) *in vitro* ssDNA-AAC8 and ssDNA-AAAC6 cleavage by WT *HsMGME1*. DNA concentrations are 0.8  $\mu$ M. Protein concentrations are 0.8  $\mu$ M, 0.4  $\mu$ M, 0.2  $\mu$ M, 0.1  $\mu$ M, 0.05  $\mu$ M, 0.025  $\mu$ M, and 0.0125  $\mu$ M in lanes 1-7, respectively. *HsMGME1* is absent in the lane labelled with No.

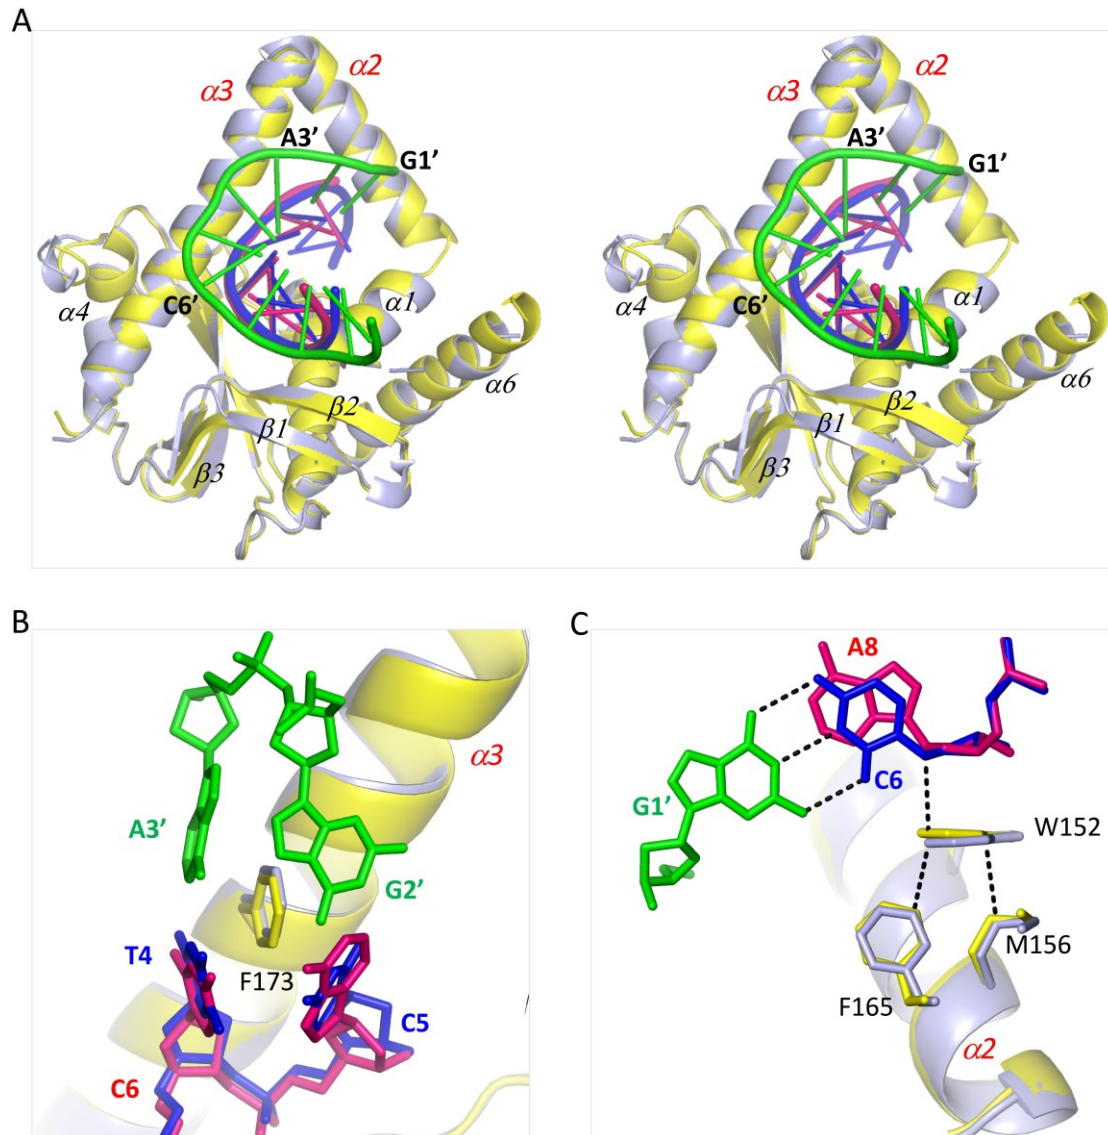

**Supplementary Figure S3. Comparison of single-stranded and duplex DNA bound *HsMGME1*.** (A) Stereoview showing the comparison of *HsMGME1*-ssDNA2 and *HsMGME1*-DNA3 complexes. (B) and (C) Conformational comparison of the pin residues and the surrounding nucleotides. For *HsMGME1*-DNA2, the protein and DNA are colored in yellow and magenta. For *HsMGME1*-DNA3, the protein and the two DNA strands are colored in light-blue, green, and blue, respectively. The sequences of ssDNA2 (5'-AACACAACAAC-3') and DNA3 (5'-GGATCCTTCTTCTTCTC -3') have no coincidence.

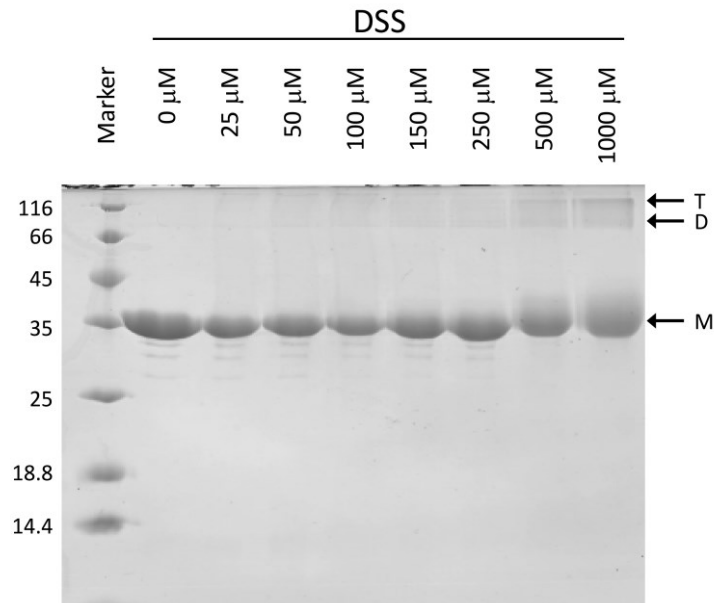

**Supplementary Figure S4. DSS crosslinking analysis of *HsMGME1*.** Protein and DNA3 concentrations are 50  $\mu\text{M}$  and 50  $\mu\text{M}$ , respectively. DSS concentrations are indicated on the gel. The bands corresponding to the monomer, dimer, and tetramer of *HsMGME1* are indicated by arrows and labelled as M, D, and T, respectively.

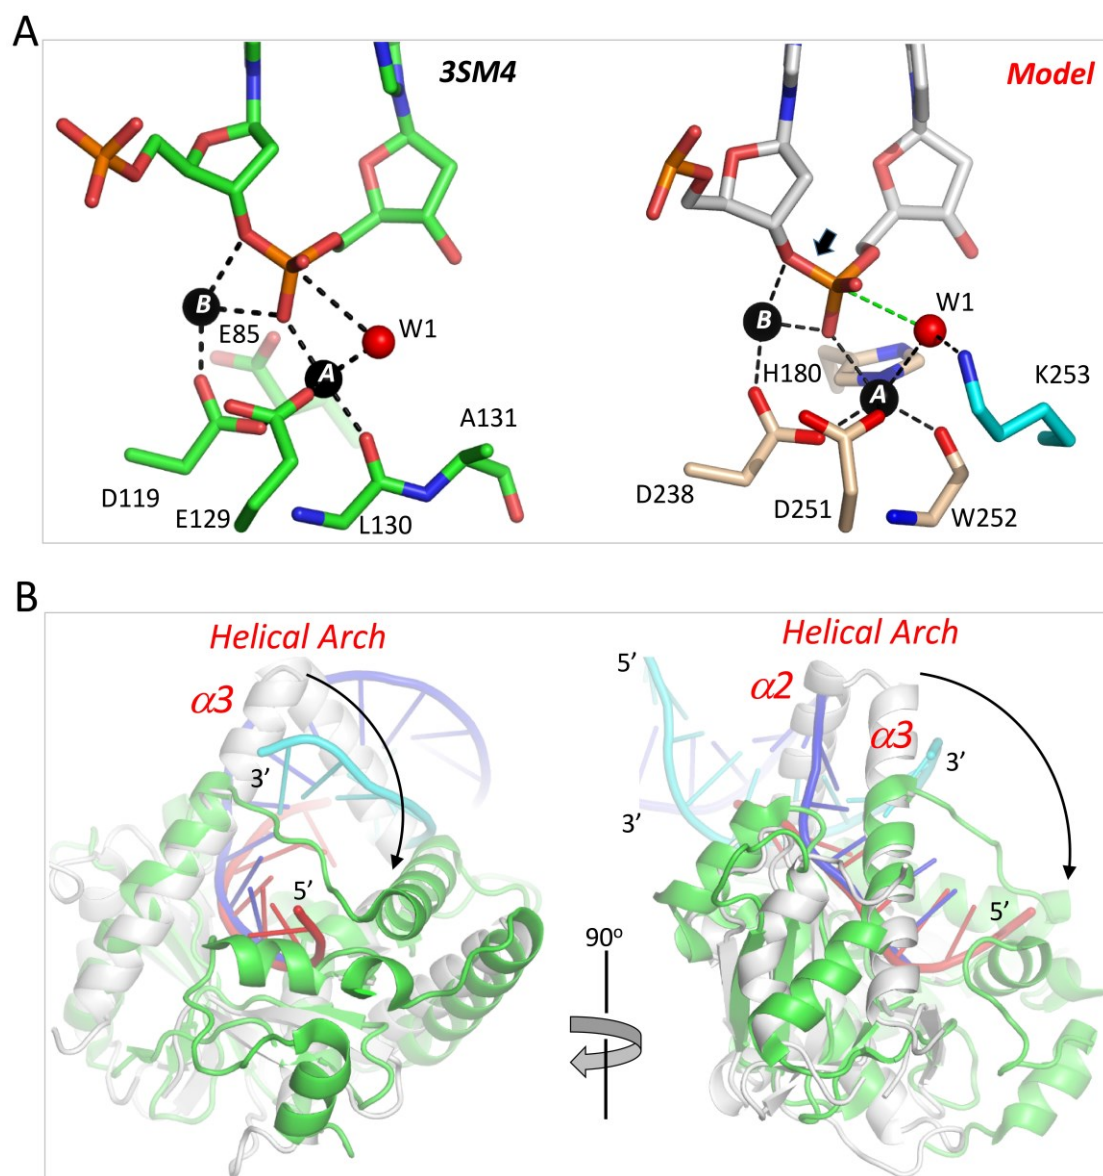

**Supplementary Figure S5. Structural comparison between *HsMGME1* and phage lambda nuclease.** (A) Comparison of the active site structure of the K131A mutant of phage lambda nuclease (PDB\_ID: 3SM4) and the catalytic MGME1 model we proposed. Cations and the catalytic water molecule are shown as spheres in black and red, respectively. (B) Structural superposition showing the flexibility of the regions corresponding to the helical arch of *HsMGME1*. *HsMGME1* and the phage lambda nuclease are colored in white and green, respectively. DNA is colored in red in *HsMGME1*-DNA2 structure, whereas it is colored in blue and cyan in the phage lambda nuclease structure.

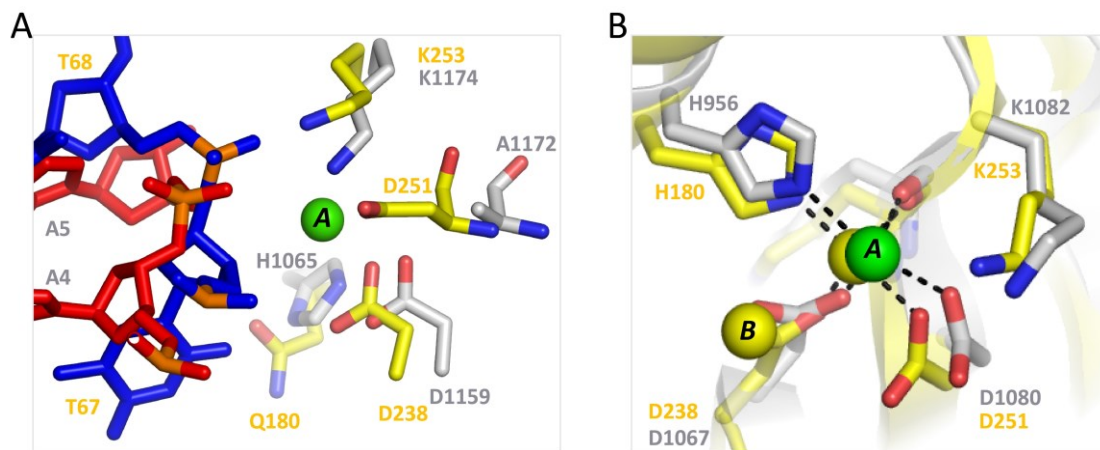

**Supplementary Figure S6. Structural comparison between *HsMGME1* and RecB-type nucleases.** (A) Structural superposition showing the different conformations of DNAs near the cleavage sites of H180Q-ssDNA2-Ca<sup>2+</sup> and AddAB-DNA complexes. Ca<sup>2+</sup> is shown as green sphere in H180Q-ssDNA2-Ca<sup>2+</sup>. The DNA C-atoms are colored in red and blue in the H180Q-ssDNA2-Ca<sup>2+</sup> and the AddAB-DNA complexes, respectively. *HsMGME1* H180Q mutant and RecB are shown as sticks with their C-atoms colored in yellow and white, respectively. (B) Structural superposition showing the similar coordination of cations bound in the active sites of the *HsMGME1*-Mn<sup>2+</sup> and the RecBCD-DNA complexes. Mn<sup>2+</sup> of *HsMGME1*-Mn<sup>2+</sup> and Ca<sup>2+</sup> of RecBCD-DNA are shown as spheres in yellow and green, respectively. *HsMGME1* and D1172A mutant of AddA are all shown as sticks with their C-atoms colored in yellow and white, respectively.



**Supplementary Table S1.** Sequences of the primers used for WT and mutant *HsMGME1* construction

| Name                   | Sequence <sup>a</sup>                                                |
|------------------------|----------------------------------------------------------------------|
| Full-length<br>MGME1-F | CGC <u>GGATCC</u> GGTGGTGGTATGAAGATGAAGTTATTTTCAGACC<br>ATTTGCAGGCAG |
| WT-F                   | CGC <u>GGATCC</u> GAATCAGCTGCCCTTGTGGC                               |
| delN90-F               | CGC <u>GGATCC</u> GGTGAGGACAGACGAGTGCCAC                             |
| delN130-F              | CGC <u>GGATCC</u> GGTGGTGGTATACCAAGTGTGACCCGAGTCCTT<br>CAGC          |
| WT-R                   | AA <u>ACTCGAG</u> CTATTCTGAATATTCTGGTTTCTGAATATTC                    |
| WT-delC-R              | AA <u>ACTCGAG</u> CTATTTCTTTCCGTATATTCTTCTAGTC                       |
| T134A-F                | GTGATACCAAGTGTGGCCCGAGTCCTTCAGCAG                                    |
| T134A-R                | CTGCTGAAGGACTCGGGCCACACTTGGTATCAC                                    |
| Q145A-F                | CCATGACAAAACAAGCTGTTTTCTTGTGGAGAGG                                   |
| Q145A-R                | CCTCTCCAACAAGAAAACAGCTTGTGTTGTCATGG                                  |
| W152A-F                | GTTTTCTTGTGGAGAGGGCTAAACAGCGGATG                                     |
| W152A-R                | CATCCGCTGTTTAGCCCTCTCCAACAAGAAAAC                                    |
| F173A-F                | GAATACACTTCAAACGTCGCTTTACAAGGGAAACGGTTC                              |
| F173A-R                | GAACCGTTTCCCTTGTAAGCGACGTTTGAAGTGTATTC                               |
| H180Q-F                | GGGAAACGGTTCCAAGAAGCCTTGGAAAG                                        |
| H180Q-R                | CTTTCCAAGGCTTCTTGAACCGTTTCCC                                         |
| E184Q-F                | CCACGAAGCCTTGCAAAGCATACTTTCACCCC                                     |
| E184Q-R                | GGGGTGAAAGTATGCTTTGCAAGGCTTCGTGG                                     |
| E223Q-F                | GGAGTGCGAGCTCTTCAAAGTGCTGTTCAACATG                                   |
| E223Q-R                | CATGTTGAACAGCACTTTGAAGAGCTCGCACTCC                                   |
| D238N-F                | CTATATAGGTCTGCTGAACTGTGTGGCTGAGTATC                                  |
| D238N-R                | GATACTCAGCCACACAGTTCAGCAGACCTATATAG                                  |
| D251N-F                | GCAAGCTCTGTGTGATTAATTGGAAGACATCAGAG                                  |
| D251N-R                | CTCTGATGTCTTCCAATTAATCACACAGAGCTTGC                                  |
| T254A-F                | GTGTGATTGATTGGAAGGCTTCAGAGAAACCAAAG                                  |
| T254A-R                | CTTTGGTTTCTCTGAAGCCTTCCAATCAATCACAC                                  |
| F266A-F                | GCCTTTTATTCAAAGTACAGCTGACAACCCACTGC                                  |
| F266A-R                | GCAGTGGGTTGTGACAGCTGTACTTTGAATAAAAGGC                                |
| Q271A-F                | GACAACCCACTGGCTGTTGTGGCATAACATGGG                                    |
| Q271A-R                | CCCATGTATGCCACAACAGCCAGTGGGTTG TC                                    |
| Y275A-F                | CTGCAAGTTGTGGCAGCTATGGGTGCCATGAAC                                    |
| Y275A-R                | GTTTCATGGCACCCATAGCTGCCACAACCTTGCAG                                  |

<sup>a</sup>GGATCC and CTCGAG highlighted with underline are BamHI and XhoI recognition sequence.

**Supplementary Table S2.** Data collection and refinement statistics <sup>a</sup>

| Structure<br>(PDB ID)                         | MGME1-Mn <sup>2+</sup><br>5ZYW   | MGME1-DNA2<br>5ZYU | H180Q-DNA2-Ca <sup>2+</sup><br>5ZYV | MGME1-DNA3<br>5ZYT | Se-MGME1-<br>DNA3 |
|-----------------------------------------------|----------------------------------|--------------------|-------------------------------------|--------------------|-------------------|
| <b>Data collection<sup>a</sup></b>            |                                  |                    |                                     |                    |                   |
| Space group                                   | P4 <sub>3</sub> 2 <sub>1</sub> 2 | P3 <sub>2</sub>    | P2 <sub>1</sub> 2 <sub>1</sub> 2    | C2                 | C2                |
| Cell parameter:                               |                                  |                    |                                     |                    |                   |
| a (Å)                                         | 68.0                             | 80.7               | 81.3                                | 146.5              | 146.3             |
| b (Å)                                         | 68.0                             | 80.7               | 106.2                               | 77.5               | 78.2              |
| c (Å)                                         | 114.8                            | 79.8               | 33.4                                | 164.7              | 165.7             |
| β (°)                                         | 90                               | 90.0               | 90.0                                | 112.4              | 112.4             |
| Wavelength (Å)                                | 0.9793                           | 0.9793             | 0.9793                              | 0.9793             | 0.9793            |
| Resolution (Å)                                | 30.0-2.20                        | 30.0-1.75          | 30.0-2.70                           | 30.0-2.70          | 30.0-3.0          |
| Last shell (Å)                                | 2.28-2.20                        | 1.81-1.75          | 2.80-2.70                           | 2.80-2.70          | 3.05-3.0          |
| Completeness (%)                              | 100.0(100.0)                     | 100.0(100.0)       | 97.6(86.8)                          | 94.6(90.6)         | 99.9(100.0)       |
| Redundancy                                    | 21.6(14.8)                       | 9.6(8.0)           | 7.5(3.4)                            | 5.6(5.1)           | 6.6(6.5)          |
| I/σ(I)                                        | 31.0(2.5)                        | 16.4(2.3)          | 17.3(2.7)                           | 15.4(2.2)          | 16.0(2.1)         |
| Rmerge (%)                                    | 10.5(48.0)                       | 9.4(47.7)          | 9.5(35.6)                           | 9.4(46.4)          | 12.7(69.5)        |
| <b>Refinement</b>                             |                                  |                    |                                     |                    |                   |
| Resolution (Å)                                | 29.9-2.20                        | 28.4-1.75          | 28.3-2.72                           | 30.0-2.70          |                   |
| R <sub>work</sub> (%) / R <sub>free</sub> (%) | 22.6/25.2                        | 17.4/20.0          | 21.2/25.4                           | 25.0/29.6          |                   |
| No. of atoms                                  |                                  |                    |                                     |                    |                   |
| Protein                                       | 1854                             | 3541               | 1555                                | 7164               |                   |
| DNA                                           |                                  | 290                | 126                                 | 872                |                   |
| Cations                                       | 3                                |                    | 2                                   |                    |                   |
| water                                         | 94                               | 532                | 13                                  |                    |                   |
| R.m.s. deviations                             |                                  |                    |                                     |                    |                   |
| Bond length (Å)                               | 0.007                            | 0.011              | 0.004                               | 0.010              |                   |
| Bond angle (°)                                | 1.113                            | 1.036              | 0.613                               | 1.250              |                   |
| Ramachandran plot (%)                         |                                  |                    |                                     |                    |                   |
| Most favored                                  | 98.7                             | 98.6               | 95.3                                | 96.0               |                   |
| Additional allowed                            | 1.3                              | 1.4                | 4.7                                 | 4.0                |                   |

<sup>a</sup>: Values in parentheses are for the last resolution shell.

**Supplementary Table S3.** Sequences of DNAs used in crystallization and *in vitro* cleavage assays

| Name                                                        | Sequence (5'-3')                          |
|-------------------------------------------------------------|-------------------------------------------|
| <b>DNAs for crystallization</b>                             |                                           |
| ssDNA2                                                      | AACAACAACAAC                              |
| DNA3                                                        | <u>GGATCCTTCTTCTTCTTC</u>                 |
| <b>DNAs for <i>in vitro</i> cleavage assay <sup>a</sup></b> |                                           |
| ssDNA1                                                      | TTCTTCTTCTTC                              |
| ssDNA2                                                      | AACAACAACAAC                              |
| dsDNA4                                                      | <u>GGATGGGGGATCCCCCATCC</u>               |
| 5'-overhang DNA4                                            | TTCTTCTTCTTC <u>CGGATGGGGGATCCCCCATCC</u> |
| 3'-overhang DNA4                                            | <u>GGATGGGGGATCCCCCATCC</u> TTCTTCTTCTTC  |
| ssDNA-TTC8                                                  | TTCTTCTTCTTCTTCTTCTTC                     |
| ssDNA-TTTC6                                                 | TTTCTTTCTTTCTTTC                          |
| ssDNA-AAC8                                                  | AACAACAACAACAACAACAACAAC                  |
| ssDNA-AAAC6                                                 | AAACAAACAAACAAACAAACAAAC                  |

<sup>a</sup>: Except 5'-overhang DNA4 that was FAM-labelled at the 3'-end, all other DNAs are FAM-labelled at their 5'-ends. The sequences that can form self-complementary duplexes are highlighted with underlines.
